# Supplementary material for: Comparison of Abbreviated MRI and Full Diagnostic MRI in Distinguishing between Benign and Malignant Lesions Detected by Breast MRI: A Multireader Study
Source: PubMed Central journal article supplement — Korean J Radiol. 2020 Nov 26;22(3):297–307. doi: 10.3348/kjr.2020.0311 (PMC7909852; doi:10.3348/kjr.2020.0311), 2020-11-26
Supplement: kjr-22-297-s001.pdf [file kjr-22-297-s001.pdf]

## SUPPLEMENTARY MATERIAL

### MRI Examinations

For the 1.5T system, bilateral sagittal, fat-suppressed T2-weighted fast spin-echo images (repetition time/echo time [TR/TE], 5500–7150/82 ms; matrix, 256 x 160; field of view, 200 x 200 mm; slice thickness, 1.5 mm; no gap) were obtained. Dynamic contrast-enhanced (DCE)-MRI was obtained using a bilateral sagittal fat-suppressed T1-weighted three-dimensional (3D) fast spoiled gradient echo sequence (TR/TE, 6.5/2.5 ms; matrix, 256 x 160; flip angle, 10°; field of view, 200 x 200 mm; slice thickness, 1.5 mm; no gap). For the 3T system, bilateral axial, fat-suppressed T2-weighted fast spin-echo images (TR/TE, 9500–11000/70 ms; matrix, 256 x 224; field of view, 300 x 300 mm; slice thickness, 1 mm; no gap) were obtained. DCE-MRI was performed using a bilateral axial fat-suppressed T1-weighted 3D fast spoiled gradient-echo sequence (TR/TE, 5.2/2.4 ms; matrix, 332 x 332; flip angle, 12°; field of view, 300 x 300 mm; slice thickness, 1 mm; no gap). One precontrast and 5 postcontrast dynamic series were obtained 90, 180, 270, 360, and 450 s after the intravenous administration of gadobutrol (Gadovist; Bayer Schering Pharma) using an automated injector (Spectris Solaris; Medrad Europe) at a dose of 0.1 mmol/kg and a rate of 2 mL/s, followed by a 20-mL saline flush.
